# Supplementary material for: Do monkeys compare themselves to others?
Source: PubMed Central journal article supplement (PMC4751161; doi:10.1007/s10071-015-0943-4), 2015-11-28
Supplement: 10071_2015_943_MOESM1_ESM.pdf [file 10071_2015_943_MOESM1_ESM.pdf]

# Do monkeys compare themselves to others?

## Electronic Supplement

Vanessa Schmitt      Ira Federspiel      Johanna Eckert      Stefanie Keupp  
Laura Tschernek      Lauriane Faraut      Richard Schuster      Corinna Michels  
Holger Sennhenn-Reulen      Thomas Bugnyar      Thomas Mussweiler  
Julia Fischer

Corresponding Author: Julia Fischer,  
Cognitive Ethology Laboratory,  
German Primate Center, Göttingen,  
Email: [jfischer@dpz.eu](mailto:jfischer@dpz.eu)

## Contents

|          |                                                                                      |           |
|----------|--------------------------------------------------------------------------------------|-----------|
| <b>1</b> | <b>Sources of Stimuli for the Male/Female Discrimination Task</b>                    | <b>2</b>  |
| <b>2</b> | <b>Modeling Repeated Binary Outcomes</b>                                             | <b>3</b>  |
| <b>3</b> | <b>Modeling Quantiles of Repeated Reaction-Times</b>                                 | <b>4</b>  |
| 3.1      | Basics . . . . .                                                                     | 4         |
| 3.1.1    | Quantile Regression . . . . .                                                        | 5         |
| 3.2      | Modeling Quantiles of Repeated Reaction-Times . . . . .                              | 6         |
| 3.2.1    | Selection of Penalty Parameter . . . . .                                             | 7         |
| 3.2.2    | Bootstrap 95% Confidence-Intervals with Dependence Re-sampling                       | 7         |
| 3.2.3    | R-Functions . . . . .                                                                | 9         |
| 3.2.4    | Detailed Results . . . . .                                                           | 12        |
| 3.3      | Verification Using Bayesian Quantile Regression of Repeated Reaction-Times . . . . . | 35        |
|          | <b>References</b>                                                                    | <b>36</b> |

# 1 Sources of Stimuli for the Male/Female Discrimination Task

| Stimulus category | Type of source                               | Link                                                                                                                                                                                                                                                                                                                                                                                                                                                                                                                                                                                                                                                                                                                                                                                                                                                                                                                                                                                                                                                                                                                                   |
|-------------------|----------------------------------------------|----------------------------------------------------------------------------------------------------------------------------------------------------------------------------------------------------------------------------------------------------------------------------------------------------------------------------------------------------------------------------------------------------------------------------------------------------------------------------------------------------------------------------------------------------------------------------------------------------------------------------------------------------------------------------------------------------------------------------------------------------------------------------------------------------------------------------------------------------------------------------------------------------------------------------------------------------------------------------------------------------------------------------------------------------------------------------------------------------------------------------------------|
| Faces             | Park aging mind laboratory (online database) | <a href="http://agingmind.utdallas.edu/stimuli">http://agingmind.utdallas.edu/stimuli</a>                                                                                                                                                                                                                                                                                                                                                                                                                                                                                                                                                                                                                                                                                                                                                                                                                                                                                                                                                                                                                                              |
| Half bodies       | Various internet sources                     | <a href="http://www.witt-weiden.de">http://www.witt-weiden.de</a><br><a href="http://www.baur.de">http://www.baur.de</a><br><a href="http://www.sheego.de">http://www.sheego.de</a><br><a href="http://www.hm.com">http://www.hm.com</a><br><a href="http://www.pullandbear.com">http://www.pullandbear.com</a><br><a href="http://www.urbanoutfitters.de">http://www.urbanoutfitters.de</a><br><a href="http://www.albamoda.de">http://www.albamoda.de</a><br><a href="http://store.americanapparel.net">http://store.americanapparel.net</a><br><a href="http://www.bandyshirt.com">http://www.bandyshirt.com</a><br><a href="http://www.peterhahn.de">http://www.peterhahn.de</a><br><a href="http://www.easy+D66youngfashion.de">http://www.easy+D66youngfashion.de</a><br><a href="http://www.sachenonlinekaufen.de">http://www.sachenonlinekaufen.de</a><br><a href="http://content.yancor.de">http://content.yancor.de</a><br><a href="http://www.arqueonautas.de">http://www.arqueonautas.de</a><br><a href="http://www.trachten24.eu">http://www.trachten24.eu</a><br><a href="http://www.kademo.de">http://www.kademo.de</a> |
| Whole bodies      | Various internet sources                     | <a href="http://store-de.hugoboss.com">http://store-de.hugoboss.com</a><br><a href="http://www.hm.com">http://www.hm.com</a><br><a href="http://www.esprit.de">http://www.esprit.de</a><br><a href="http://www.c-and-a.com">http://www.c-and-a.com</a><br><a href="http://www.kleider-kunst.de">http://www.kleider-kunst.de</a><br><a href="http://www.soliver.de">http://www.soliver.de</a><br><a href="http://www.michaelax.de">http://www.michaelax.de</a><br><a href="http://www.burdastyle.de">http://www.burdastyle.de</a><br><a href="http://www.wellner.modehaus.de">http://www.wellner.modehaus.de</a>                                                                                                                                                                                                                                                                                                                                                                                                                                                                                                                        |

Table S1: Sources of stimuli for the male/female discrimination task.

## 2 Modeling Repeated Binary Outcomes

Success outcomes were analyzed using mixed-effects models for binary response variables with Logit link-function.

In a first step, Generalized Estimation Equation (GEE) models with first-order auto-correlation structure (AR(1)) are applied. Since the absolute auto-correlation parameter  $|\rho|$  was only very small ( $< 0.05$ ), we conclude that there is only negligible dependence between the trials in one session for one subject and consequently use models with an independence correlation-structure, what results in applying ordinary generalized linear mixed models (GLMMs).

For the specification of GLMMs with binomially distributed (binary) outcomes with the Logit link-function, R (R Core Team, 2015) library `lme4` (Bates et al., 2015) was applied, in especially function `glmer()` was used to fit the models.

Selection of random slopes was performed via comparison of variances of random slopes and random intercepts. For the models without *social control*, only the random slope for variable *extremity* provided considerable variance (about 1/3 of the variance explained by the random intercept). Therefore we report results for the model with a random slope for extremity. For the model with social control, none of the explanatory variables yielded a relevant random slope variance, and consequently the random intercept model is reported.

### 3 Modeling Quantiles of Repeated Reaction-Times

#### 3.1 Basics

The mean is a centrality parameter of a distribution function, as for example parameter  $\mu$  in the Normal distribution:

$$Y \sim \text{Normal}(\mu, \sigma^2) \Rightarrow f_{\mu, \sigma}(Y = y) = \frac{1}{\sqrt{2\pi} \cdot \sigma} \cdot \exp\left(-\frac{(y - \mu)^2}{2\sigma^2}\right)$$

Parameter  $\sigma$  is a non-centrality parameter controlling the deviation from the mean.  $\sigma$  is called *standard deviation*, and  $\sigma^2$  is called *variance*.

The *cumulative density function (cdf)*  $F_{\mu, \sigma}(Y = y)$  takes the value of the integral of the density function  $f_{\mu, \sigma}(Y = y)$  until  $y$ :

$$F_{\mu, \sigma}(Y = y) = \int_{-\infty}^y f_{\mu, \sigma}(Y = z) dz.$$

It's value is a probability  $\tau \in [0, 1]$ , and it's inverse function  $Q_{\mu, \sigma}(\tau_Y) = F_{\mu, \sigma}^{-1}(Y = y)$  is called the *quantile function* specifying the  $\tau$  quantile of  $Y$  which will be denoted here by  $\tau_Y$ . For a given  $y$ , the cdf gives the probability of the random variable being equal or smaller than  $y$ . For a given probability  $\tau$ , the quantile function gives the value of the random variable where the cdf has reached this probability. Figure ?? illustrates the relationship between  $f_{\mu, \sigma}(Y = y)$ ,  $F_{\mu, \sigma}(Y = y)$  and  $F_{\mu, \sigma}^{-1}(Y = y) = Q_{\mu, \sigma}(\tau_Y)$ .

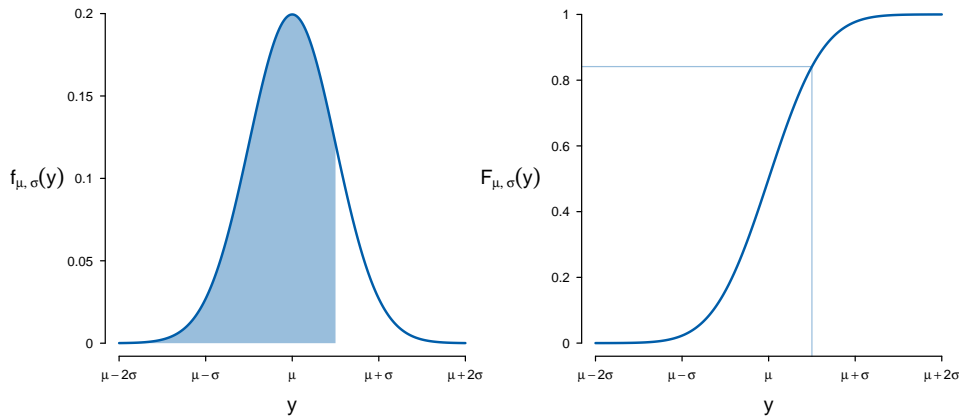

Figure S1: Relationship between  $f_{\mu, \sigma}(Y = y)$ ,  $F_{\mu, \sigma}(Y = y)$  and  $F_{\mu, \sigma}^{-1}(Y = y) = Q_{\mu, \sigma}(\tau_Y)$ .

In the *linear regression model* based on data  $(y_i, x_i)$  with continuous response variable  $y$  and covariate  $x$ , we get to the regression relationship:

$$y_i = \mu(x_i, \beta) + \epsilon_i,$$

where  $\mu(x_i, \boldsymbol{\beta}) = E(Y_i | x_i, \boldsymbol{\beta})$  is a regression predictor for the expectation/mean of  $Y_i$ , conditional on covariate observation  $x_i$  and formed in terms of a linear relationship between  $x_i$  and the regression coefficients-vector  $\boldsymbol{\beta}$ , such as the *univariate linear regression model*:

$$\mu(x_i, \boldsymbol{\beta}) = \beta_0 + x_i \beta_1,$$

with regression coefficients-vector  $\boldsymbol{\beta} = (\beta_0, \beta_1)^\top$ . For models with more covariates  $x_l$ ,  $l = 1, \dots, p$ , the linear predictor is expanded by the respective model terms  $x_l \beta_l$ .

### 3.1.1 Quantile Regression

The idea of *quantile regression* is to let the regression coefficients-vector  $\boldsymbol{\beta}$  be potentially different for different quantiles of the response. Instead of specifying only one single model for the mean, quantiles  $Q(\tau_Y)$  of  $Y$  are specified separately by linear regression predictor functions  $q(x, \boldsymbol{\beta}_\tau)$  of  $x$  and a  $\tau$ -specific regression coefficient-vector  $\boldsymbol{\beta}_\tau$ :

$$Q_{\boldsymbol{\beta}_\tau}(\tau_Y | x_i) = q(x_i, \boldsymbol{\beta}_\tau) + \epsilon_{\tau,i},$$

for  $\tau \in (0, 1)$ .

We may the again use the univariate linear regression model form to specify the coefficients separately:

$$q(x, \boldsymbol{\beta}_\tau) = \beta_{0,\tau} + x_i \beta_{1,\tau}.$$

For models with more  $x_l$ ,  $l = 1, \dots, p$ , the linear predictor is again expanded by the respective  $\tau$ -specific model terms  $x_l \beta_{l,\tau}$ . The linear regression predictor is then conveniently expressed in matrix form by:

$$\mathbf{x}_i^\top \boldsymbol{\beta}_\tau = \beta_{0,\tau} + x_{1,i} \beta_{1,\tau} + x_{2,i} \beta_{2,\tau} + \dots + x_{p,i} \beta_{p,\tau}.$$

The interpretation of effects on quantile of  $Y$  is analogously to the interpretation of effects on the mean of  $Y$ . For a binary covariate  $x_j \in \{0, 1\}$ , the effect  $\beta_{j,\tau}$  is the difference between the  $\tau^{\text{th}}$  quantiles of  $Y$  in the population where  $x_j = 0$ , and the population where  $x_j = 1$ .

## 3.2 Modeling Quantiles of Repeated Reaction-Times

Quantile Regression of repeated reaction-times is the approach that satisfied the assumptions on the statistical model:

1. Linear Mixed Effects Regression (Effects for Direction 0.075,  $p = 0.011$ , and Direction:Partner  $-0.082$ ,  $p = 0.063$ ) was not suitable since residuals were homoscedastic, but visual inspection showed them to be not satisfactorily approximately Gaussian distributed.
2. Parametric alternatives by applying Generalized Linear Mixed Effects Models (GLMMs) with log-Gaussian, inverse Gaussian, or Gamma distributed error assumptions showed only minor improvements in terms of the residual distribution.
3. The results from a semi-parametric Cox Proportional-Hazards (Cox PH) model with a random intercept term for Subjects affirmed the results from previous alternative modeling strategies for Direction and Direction:Partner, which indicated a valid mechanism in the data. The proportional hazards assumption was checked using tests for non-zero slope of Schoenfeld residuals vs time in a Cox PH model without random intercept (due to non-available software to do so for the model with random intercept). There was no indication for the violation of the PH assumption. However, when a robust variance estimator was applied, we got strong indications that the effects vary across reaction-time.
4. Parametric survival time analysis techniques, such as the Weibull Accelerated Failure Time-(AFT)-model, showed again no satisfactory distributional fit.

In especially the violation of the proportional hazards assumption led us to explore the complete distribution of the reaction-times.

The applied approach is similar to the strategy introduced in Koenker (2004). We consider the random intercepts-effects model for reaction-times  $Y$ :

$$Q_{\beta_\tau}(\tau_Y | x_{ij}) = \mathbf{x}_{ij}^\top \boldsymbol{\beta}_\tau + \beta_{0,\tau,i} + \epsilon_{\tau,ij},$$

where subscript  $i = 1, \dots, n$  is indexing individual subjects, and subscript  $j = 1, \dots, n_i$  is indexing the  $n_i$  distinct measurements made on the  $i^{\text{th}}$  subject. The overall number of observations is  $N = \sum_{i=1}^n n_i$ .

The subject- and quantile-specific intercepts  $\beta_{0,\tau,i}$  “capture some individual specific source of variability, or unobserved heterogeneity, that was not adequately controlled for by other covariates in the model” (Koenker, 2004). The variation in the values for  $\beta_{0,\tau,i}$  is known as the random intercept variance from mixed effects regression models.

Using the so-called *check-function*:

$$\rho_\tau(u) = u \cdot (\tau - \mathbb{I}_{\{u < 0\}}),$$

one has to solve the optimization problem:

$$\hat{\boldsymbol{\beta}}_{\tau} = \arg \min_{\boldsymbol{\beta}} \left\{ \sum_{i=1}^n \sum_{j=1}^{n_i} (\rho_{\tau}(y_{ij} - (\mathbf{x}_{ij}^{\top} \boldsymbol{\beta}_{\tau} + \beta_{0,\tau,i}))) + \lambda_{\tau} \sum_{i=1}^n \|\beta_{0,\tau,i}\|_1 \right\},$$

to yield parameter estimates  $\hat{\boldsymbol{\beta}}_{\tau}$ , where  $\boldsymbol{\beta}_{\tau}$  also includes  $\beta_{0,\tau,i}$ .

For the quantile loss function, it is convenient to consider the  $L_1$  penalty  $\|\beta_{0,\tau,i}\|_1 = |\beta_{0,\tau,i}|$  in place of the conventional  $L_2$  penalty. The random effects estimator is viewed as a penalized weighted absolute residual estimator: “For  $\lambda_{\tau} \rightarrow 0$  we obtain the fixed effects estimator [...], while as  $\lambda_{\tau} \rightarrow \infty$  the  $\hat{\beta}_{0,\tau,i} \rightarrow 0$  for all  $i = 1, \dots, n$  and we obtain an estimate of the model purged of the fixed effects” (Koenker, 2004). The shrinkage of the  $\hat{\beta}_{0,\tau,i}$  is advantageous in controlling the variability introduced by the large number of estimated  $\beta_{0,\tau,i}$  parameters, and the inverse  $\frac{1}{\lambda_{\tau}}$  of the penalty parameter  $\lambda_{\tau}$  is interpreted as being proportional to the random intercept variance.

The above model is implemented in R (R Core Team, 2015) library `quantreg` (Koenker, 2015), in especially by the function `rq.fit.lasso()`.

### 3.2.1 Selection of Penalty Parameter

We use repeated 10-fold cross-validation to reduce the randomness of the cross-validated selection of  $\lambda_{\tau}$ . For evaluating the predictive performance of the in-bag estimation of the out-of-bag sample, we use the average  $\tau$ -weighted error (ATWE) (Haupt et al., 2011):

$$\text{ATWE}(\tau) = \frac{1}{n_p} \sum_{i=1}^{n_p} \rho_{\tau} \left( y_i - \left( \mathbf{x}_{ij}^{\top} \hat{\boldsymbol{\beta}}_{\tau} + \hat{\beta}_{0,\tau,i} \right) \right).$$

This grid search for  $\hat{\lambda}$  is performed on a proposal vector given by  $\lambda = 0.01, 1, 2, \dots, 30$ . Since there is no contextually meaningful standard of comparison for the selection of any subject as the reference subject, and we want to get the direct interpretation of the intercept as the unpenalized population mean, no reference subject is selected, and the deviation from the population mean for each subject is introduced by penalized dummy coefficients as the random component. Without any stabilization introduced by a minimum of penalization, this parametrization of the random component is non-identifiable. So the minimum of the penalty parameter proposal vector is chosen as 0.01. If this minimal proposal value is selected, this will have only a negligible consequence on the estimation of fixed effects in comparison to an unpenalized approach with dummy-coded subjects as fixed effects. As can be seen in Section 3.2.4, this minimum penalty parameter proposal is never selected in our analyses.

### 3.2.2 Bootstrap 95% Confidence-Intervals with Dependence Re-sampling

For blocks consisting of all observations of one subject  $i$ , all paired elements  $(y_{ij}, \mathbf{x}_i)$  are re-sampled with replacements, resulting in a bootstrap sample of size  $n_i$  for subject  $i$ . This is performed for each subject  $i = 1, \dots, n$  and the block results are merged

to one global bootstrap sample containing  $N$  observations. The estimated coefficients from this sample are stored, and the procedure is replicated  $k$  times. The lower 2.5% and the upper 97.5% empirical quantiles from the  $k$  estimates for each coefficient forms the 95%-bootstrap confidence-interval. This strategy is known as the *Percentile Bootstrap*. The combined approach formed by block-dependent re-sampling and Percentile Bootstrap performed best in terms of truth coverage and length of confidence interval in a simulation study by Karlsson (2009), where several strategies to get to confidence intervals for coefficients in quantile regression on longitudinal data were compared.



### 3.2.3 R-Functions

Following function have been written in order to have a full implementation of the approach as described above.

#### Check-Function and Average $\tau$ -Weighted Error:

Input arguments:

- `y`: vector of response values
- `pre`: linear predictor values as predictor for `y`
- `tau`: quantile of the response variable

Return argument from `check_function()`: numeric vector containing values from the check-function.

```
check_function <- function(pre, y, tau){  
  u <- y - pre  
  return(as.numeric(u * (tau - as.numeric(u < 0))))}
```

Return argument from `atwe()`: numeric value containing the mean Average  $\tau$ -Weighted Error.

```
atwe <-function(pre, y, tau){  
  res <- check_function(pre = pre, y = y, tau = tau)  
  return(mean(res))}
```

#### Replicated 10-fold cross-validation

Input arguments:

- `k`: number of replications of 10-fold cross-validation
- `tau`: quantile of the response variable
- `lambda`: vector of penalty parameter proposals
- `y`: vector of response values
- `X`: design matrix for fixed effects
- `Z`: design matrix for random effects
- `ID`: subject identifier

Return argument: numeric matrix containing the cross-validated prediction errors in each outer replication loop (rows) and each of the 10 testing samples (columns).

```

kfold10fold <- function(k, tau, lambda, y, X, Z, ID){
  dat <- as.data.frame(cbind(X, Z))
  fmla <- as.formula(paste("y_in ~ -1 +", paste(names(dat), collapse= "+")))
  result <- matrix(nrow = length(lambda), ncol = k*10, 0)
  index_i <- vector("list", length(levels(ID)))
  for(i in 1:length(index_i)){
    index_i[[i]] <- which(ID == levels(ID)[i])}
  count <- 1
  for(j in 1:k){
    index <- rep(0, length(y))
    for(j2 in 1:length(index_i)){
      ho <- index_i[[j2]]
      ho <- sample(ho)
      n_i <- length(ho)
      n_in <- floor(n_i/10)
      index_i_1to10 <- rep(1:10, each = n_in)
      n_missing <- n_i - length(index_i_1to10)
      if(n_missing > 0.5){
        index_i_1to10 <- c(index_i_1to10, 1:n_missing)
      }
      index[ho] <- index_i_1to10
    }
    for(l in 1:10){
      index_in <- which(index == l)
      index_out <- which(index != l)
      dat_in <- dat[index_in, ]
      y_in <- y[index_in]
      dat_out <- dat[index_out, ]
      y_out <- y[index_out]
      for(i in 1:length(la)){
        m <- rq(fmla, lambda = c(rep(0, ncol(X)), rep(lambda[i], ncol(Z))),
              method = "lasso", tau = tau, data = dat_in)
        pre <- predict(m, newdata = dat_out)
        result[i, count] <- atwe(pre = pre, y = y_out, tau = tau)
      }
      count <- count + 1
    }
  }
  return(result)}

```

### Bootstrap 95%-Confidence-Interval:

Input arguments:

- k: number of bootstrap samples
- tau: quantile of the response variable
- lambda\_min: penalty parameter value where the minimum prediction-error was reached during the cross-validation procedure
- y: vector of response values

- X: design matrix for fixed effects
- Z: design matrix for random effects
- ID: subject identifier

Return argument: list of length two containing numeric matrices for the lower (list-element lower) and the upper (list-element upper) CI-boundaries. Each list-element is a matrix with k rows and the number of columns given by the number of fixed coefficients.

```
ci95 <- function(k, tau, lambda_min, y, X, Z, ID){
  fmla <- as.formula(paste("y ~ -1 +", paste(names(as.data.frame(cbind(X, Z))),
                                          collapse= "+")))

  x_vec <- colnames(X)
  index_i <- vector("list", length(levels(ID)))
  for(i in 1:length(index_i)){
    index_i[[i]] <- which(ID == levels(ID)[i])}
  b_i <- matrix(nrow = k, ncol = ncol(X), 0)
  colnames(b_i) <- x_vec
  dat <- as.data.frame(cbind(X, Z))
  dat_copy <- dat
  y_copy <- y
  for(i in 1:k){
    dat <- dat_copy
    y <- y_copy
    index <- NULL
    for(j in 1:length(index_i)){
      ho <- index_i[[j]]
      index <- c(index, sample(ho, size = length(ho), replace = T))
    }
    dat <- dat[index, ]
    y <- y[index]
    m_i <- rq(fmla, lambda = c(rep(0, ncol(X)), rep(lambda_min, ncol(Z))),
              method = "lasso", data = dat, tau = tau)
    b_i[i, ] <- m_i$coefficients[1:ncol(X)]
  }
  lower <- apply(b_i, MAR = 2, FUN = quantile, probs = c(0.025))
  upper <- apply(b_i, MAR = 2, FUN = quantile, probs = c(0.975))
  return(list(lower = lower, upper = upper))}
```

### 3.2.4 Detailed Results

Comparison methods are:

- rq without subject: `rq` from `quantreg` without `Subject`.
- rq with subject as fixed effect: `rq` from `quantreg` with `Subject` as fixed effects variable.

### 5%-Quantile Regression of Repeated Reaction-Times

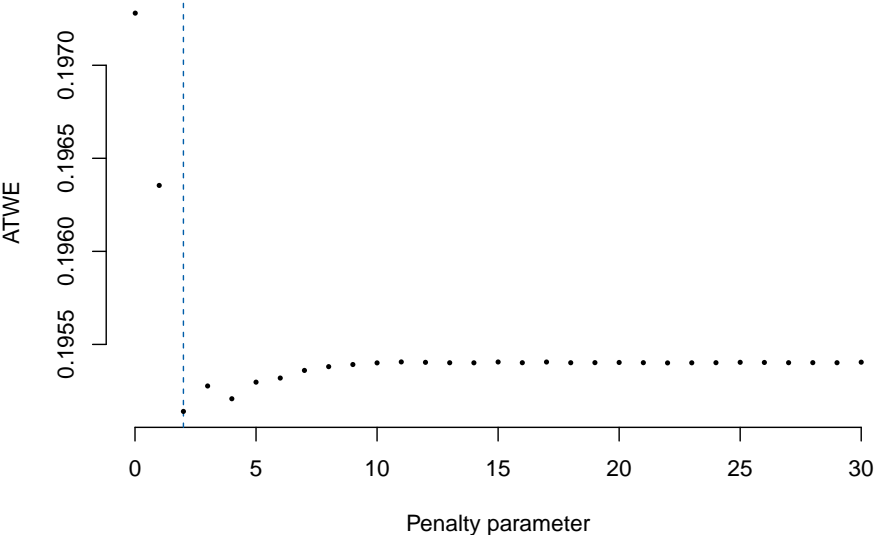

Figure S2: Average  $\tau$ -weighted error (ATWE) across penalty parameter proposals.

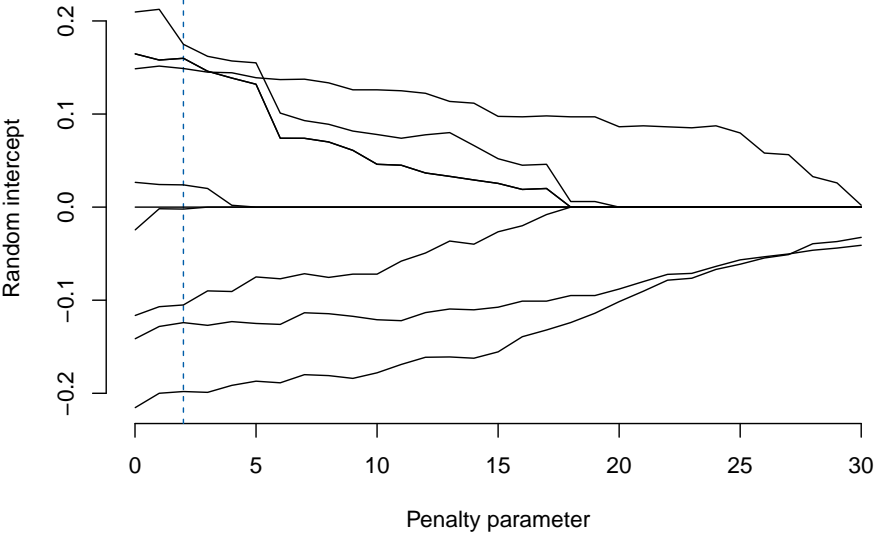

Figure S3: Normalized random intercepts across penalty parameter proposals.

|                 | $\hat{\beta}_{\text{rq}}$ without subject | $\hat{\beta}_{\text{rq}}$ with subject as fixed effect | $\hat{\beta}$ | CI <sub>low</sub> | CI <sub>up</sub> |
|-----------------|-------------------------------------------|--------------------------------------------------------|---------------|-------------------|------------------|
| Intercept       | 0.899                                     | 0.959                                                  | 0.938         | 0.823             | 1.052            |
| PartnerP        | 0.042                                     | 0.063                                                  | 0.068         | -0.015            | 0.163            |
| NoveltyO        | 0.007                                     | 0.014                                                  | 0.017         | -0.053            | 0.078            |
| Block2          | 0.034                                     | 0.014                                                  | 0.012         | -0.054            | 0.076            |
| DirectionW      | 0.017                                     | -0.006                                                 | -0.010        | -0.100            | 0.103            |
| ExtremityM      | -0.015                                    | -0.025                                                 | -0.014        | -0.101            | 0.078            |
| IntDrcExt       | 0.005                                     | 0.043                                                  | 0.052         | -0.104            | 0.161            |
| IntDrcPartner_P | -0.063                                    | -0.088                                                 | -0.090        | -0.223            | 0.046            |

### 10%-Quantile Regression of Repeated Reaction-Times

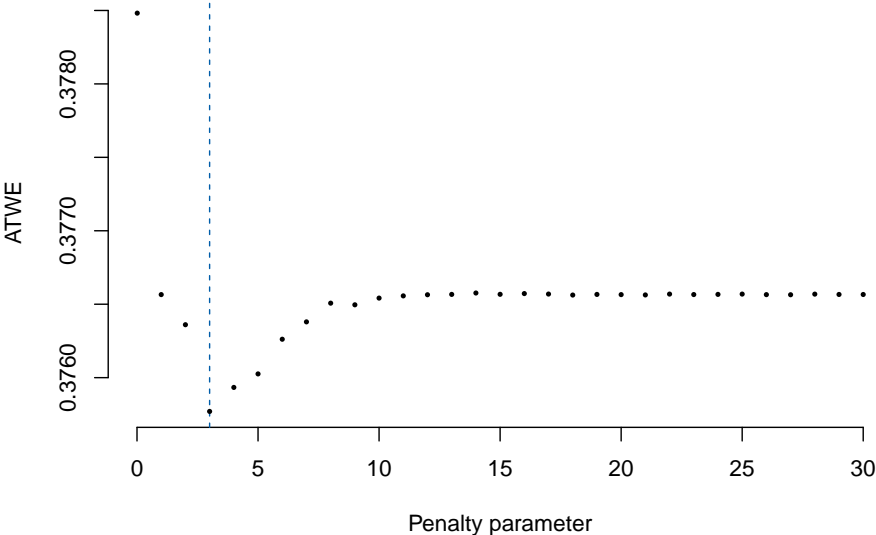

Figure S4: Average  $\tau$ -weighted error (ATWE) across penalty parameter proposals.

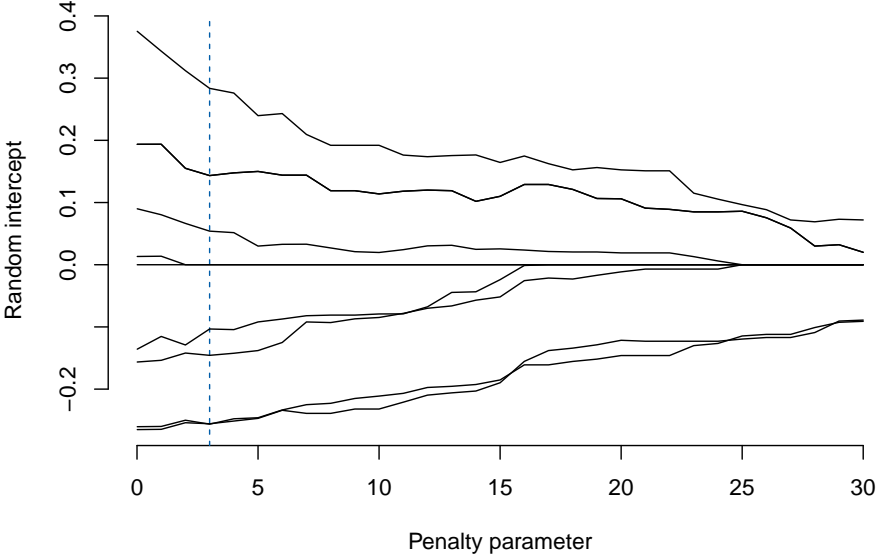

Figure S5: Normalized random intercepts across penalty parameter proposals.

|                 | $\hat{\beta}_{\text{rq}}$ without subject | $\hat{\beta}_{\text{rq}}$ with subject as fixed effect | $\hat{\beta}$ | CI <sub>low</sub> | CI <sub>up</sub> |
|-----------------|-------------------------------------------|--------------------------------------------------------|---------------|-------------------|------------------|
| Intercept       | 1.104                                     | 1.133                                                  | 1.156         | 0.997             | 1.243            |
| PartnerP        | 0.020                                     | 0.079                                                  | 0.085         | -0.017            | 0.182            |
| NoveltyO        | -0.026                                    | -0.004                                                 | -0.017        | -0.091            | 0.058            |
| Block2          | 0.016                                     | -0.020                                                 | -0.023        | -0.084            | 0.078            |
| DirectionW      | 0.040                                     | 0.065                                                  | 0.078         | -0.067            | 0.177            |
| ExtremityM      | 0.049                                     | 0.022                                                  | 0.015         | -0.080            | 0.107            |
| IntDrcExt       | -0.022                                    | -0.019                                                 | -0.019        | -0.157            | 0.127            |
| IntDrcPartner_P | -0.090                                    | -0.133                                                 | -0.146        | -0.269            | 0.010            |



### 20%-Quantile Regression of Repeated Reaction-Times

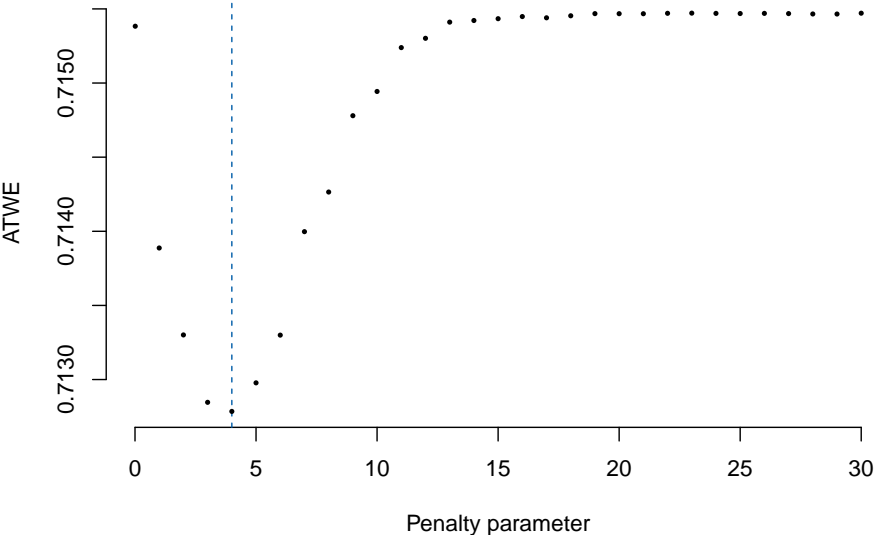

Figure S6: Average  $\tau$ -weighted error (ATWE) across penalty parameter proposals.

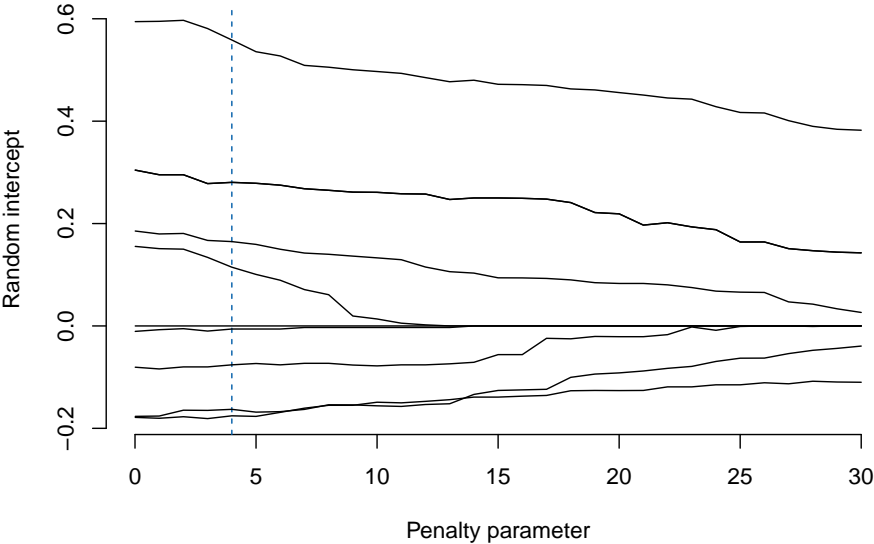

Figure S7: Normalized random intercepts across penalty parameter proposals.

|                 | $\hat{\beta}_{\text{rq}}$ without subject | $\hat{\beta}_{\text{rq}}$ with subject as fixed effect | $\hat{\beta}$ | CI <sub>low</sub> | CI <sub>up</sub> |
|-----------------|-------------------------------------------|--------------------------------------------------------|---------------|-------------------|------------------|
| Intercept       | 1.339                                     | 1.407                                                  | 1.342         | 1.213             | 1.474            |
| PartnerP        | 0.057                                     | 0.081                                                  | 0.069         | -0.035            | 0.193            |
| NoveltyO        | -0.035                                    | -0.033                                                 | -0.044        | -0.120            | 0.053            |
| Block2          | 0.016                                     | -0.013                                                 | -0.009        | -0.097            | 0.080            |
| DirectionW      | 0.139                                     | 0.115                                                  | 0.115         | -0.032            | 0.243            |
| ExtremityM      | 0.082                                     | 0.073                                                  | 0.069         | -0.049            | 0.174            |
| IntDrcExt       | -0.156                                    | -0.094                                                 | -0.111        | -0.253            | 0.095            |
| IntDrcPartner_P | -0.125                                    | -0.153                                                 | -0.150        | -0.321            | 0.023            |

### 30%-Quantile Regression of Repeated Reaction-Times

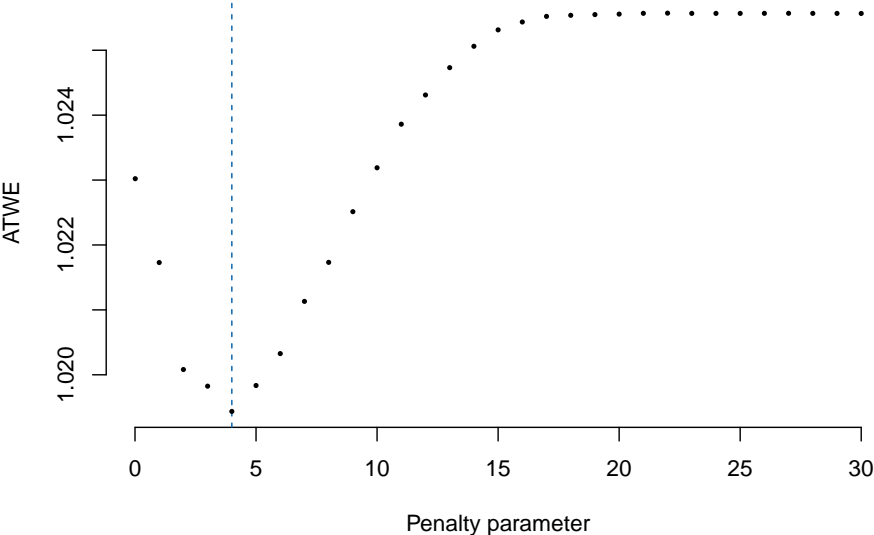

Figure S8: Average  $\tau$ -weighted error (ATWE) across penalty parameter proposals.

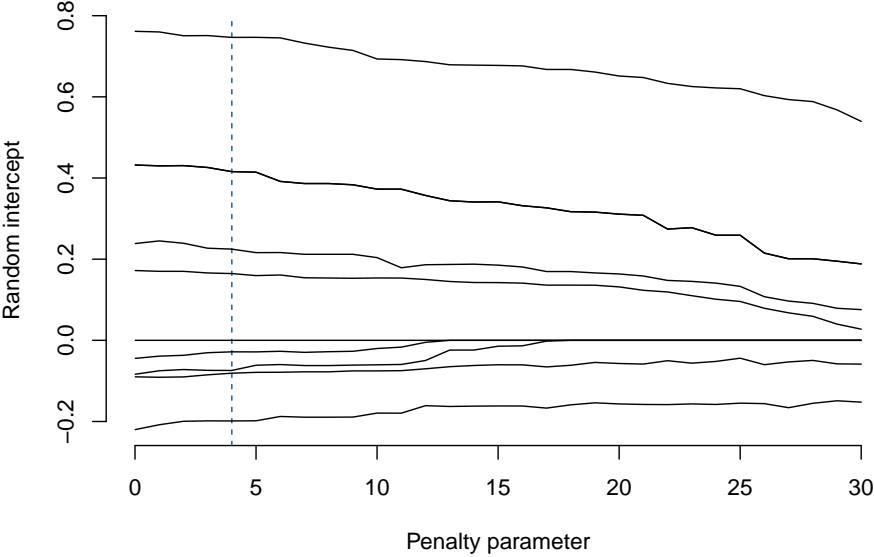

Figure S9: Normalized random intercepts across penalty parameter proposals.

|                 | $\hat{\beta}_{\text{rq}}$ without subject | $\hat{\beta}_{\text{rq}}$ with subject as fixed effect | $\hat{\beta}$ | CI <sub>low</sub> | CI <sub>up</sub> |
|-----------------|-------------------------------------------|--------------------------------------------------------|---------------|-------------------|------------------|
| Intercept       | 1.613                                     | 1.610                                                  | 1.476         | 1.374             | 1.709            |
| PartnerP        | 0.096                                     | 0.113                                                  | 0.121         | -0.016            | 0.263            |
| NoveltyO        | -0.009                                    | -0.025                                                 | -0.020        | -0.117            | 0.079            |
| Block2          | -0.017                                    | 0.017                                                  | 0.014         | -0.088            | 0.114            |
| DirectionW      | 0.169                                     | 0.233                                                  | 0.241         | 0.024             | 0.370            |
| ExtremityM      | 0.095                                     | 0.139                                                  | 0.139         | -0.029            | 0.245            |
| IntDrcExt       | -0.169                                    | -0.191                                                 | -0.198        | -0.353            | 0.036            |
| IntDrcPartner_P | -0.182                                    | -0.222                                                 | -0.240        | -0.392            | -0.012           |

### 40%-Quantile Regression of Repeated Reaction-Times

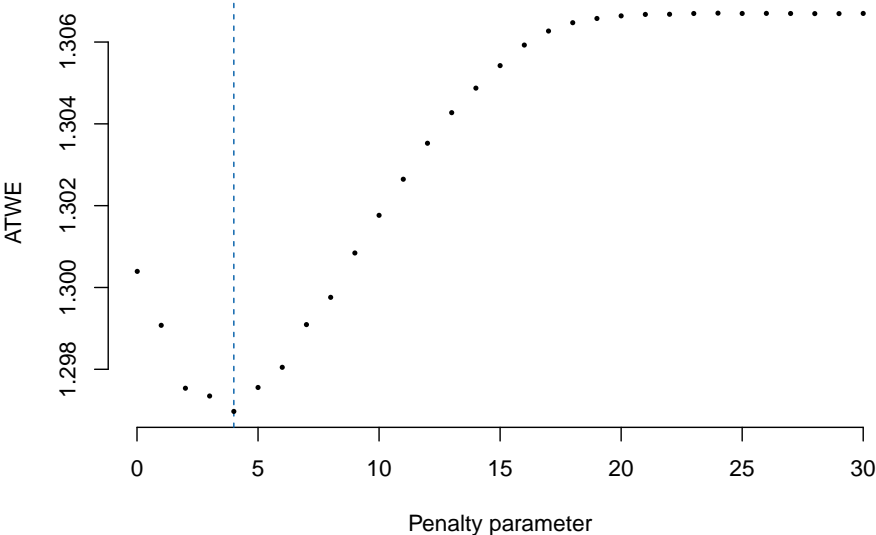

Figure S10: Average  $\tau$ -weighted error (ATWE) across penalty parameter proposals.

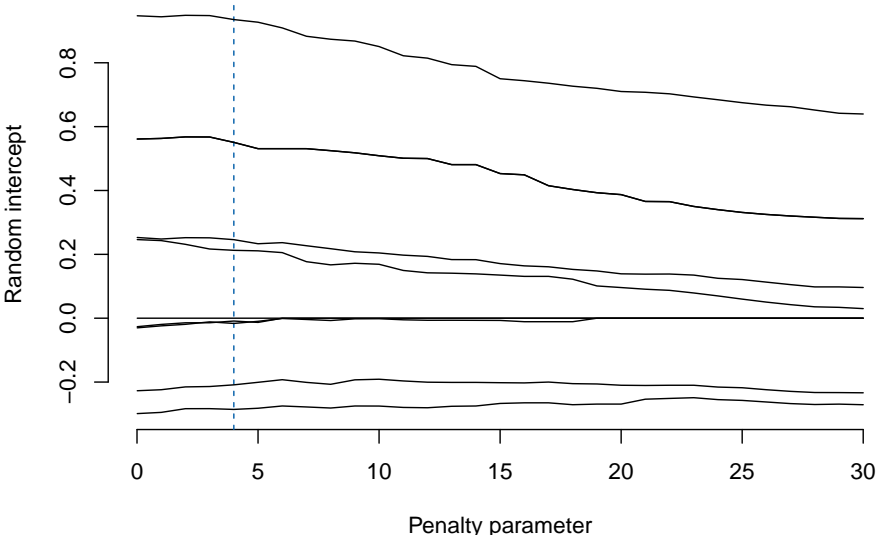

Figure S11: Normalized random intercepts across penalty parameter proposals.

|                 | $\hat{\beta}_{\text{rq}}$ without subject | $\hat{\beta}_{\text{rq}}$ with subject as fixed effect | $\hat{\beta}$ | CI <sub>low</sub> | CI <sub>up</sub> |
|-----------------|-------------------------------------------|--------------------------------------------------------|---------------|-------------------|------------------|
| Intercept       | 1.823                                     | 1.913                                                  | 1.762         | 1.618             | 2.018            |
| PartnerP        | 0.144                                     | 0.127                                                  | 0.118         | -0.029            | 0.287            |
| NoveltyO        | 0.024                                     | 0.012                                                  | 0.018         | -0.116            | 0.119            |
| Block2          | 0.039                                     | 0.046                                                  | 0.059         | -0.060            | 0.171            |
| DirectionW      | 0.229                                     | 0.205                                                  | 0.181         | -0.003            | 0.398            |
| ExtremityM      | 0.129                                     | 0.117                                                  | 0.101         | -0.058            | 0.270            |
| IntDrcExt       | -0.148                                    | -0.133                                                 | -0.122        | -0.340            | 0.121            |
| IntDrcPartner_P | -0.199                                    | -0.210                                                 | -0.199        | -0.436            | 0.017            |

## Median Regression of Repeated Reaction-Times

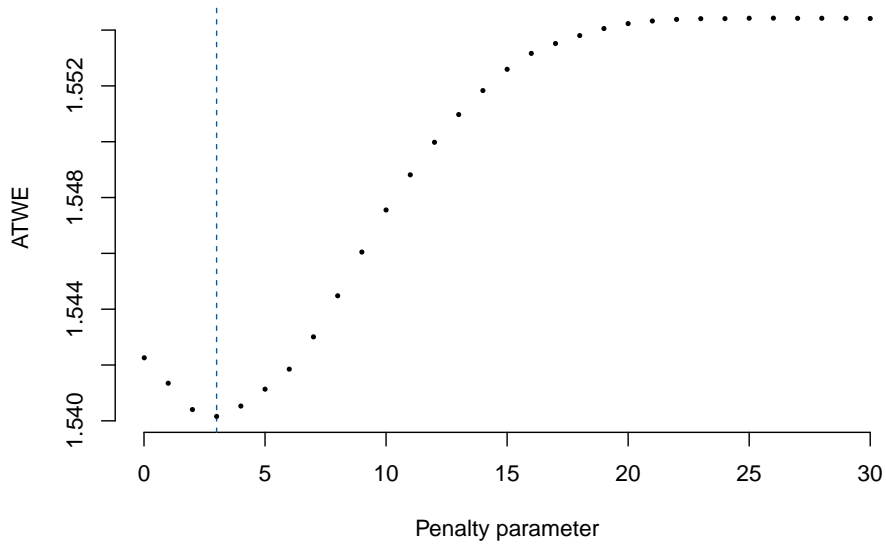

Figure S12: Average  $\tau$ -weighted error (ATWE) across penalty parameter proposals.

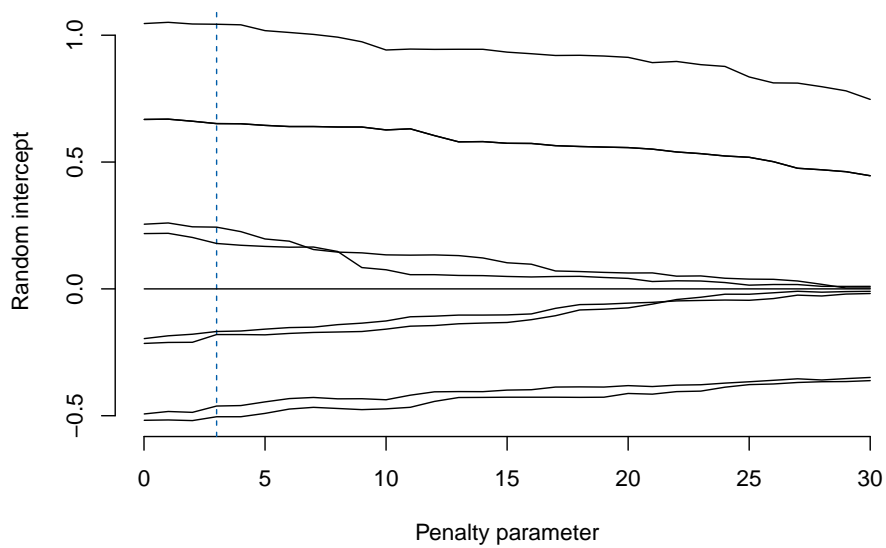

Figure S13: Normalized random intercepts across penalty parameter proposals.

|                 | $\hat{\beta}_{\text{rq}}$ without subject | $\hat{\beta}_{\text{rq}}$ with subject as fixed effect | $\hat{\beta}$ | CI <sub>low</sub> | CI <sub>up</sub> |
|-----------------|-------------------------------------------|--------------------------------------------------------|---------------|-------------------|------------------|
| Intercept       | 2.221                                     | 2.303                                                  | 2.197         | 1.932             | 2.481            |
| PartnerP        | 0.118                                     | 0.068                                                  | 0.085         | -0.143            | 0.282            |
| NoveltyO        | 0.026                                     | 0.004                                                  | 0.026         | -0.147            | 0.162            |
| Block2          | 0.078                                     | 0.151                                                  | 0.145         | -0.016            | 0.297            |
| DirectionW      | 0.175                                     | 0.117                                                  | 0.125         | -0.125            | 0.446            |
| ExtremityM      | 0.141                                     | 0.108                                                  | 0.093         | -0.094            | 0.316            |
| IntDrcExt       | -0.122                                    | -0.122                                                 | -0.092        | -0.403            | 0.186            |
| IntDrcPartner_P | -0.206                                    | -0.115                                                 | -0.133        | -0.447            | 0.172            |



### 60%-Quantile Regression of Repeated Reaction-Times

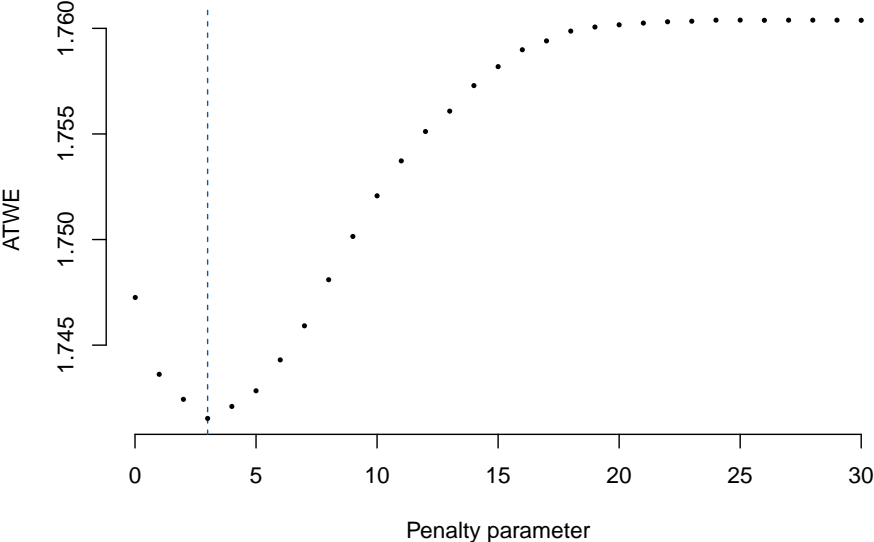

Figure S14: Average  $\tau$ -weighted error (ATWE) across penalty parameter proposals.

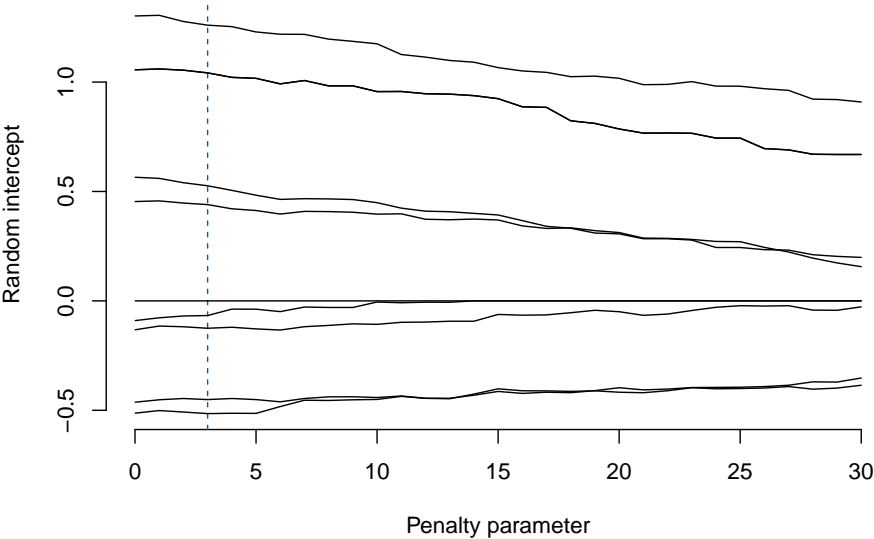

Figure S15: Normalized random intercepts across penalty parameter proposals.

|                 | $\hat{\beta}_{\text{rq}}$ without subject | $\hat{\beta}_{\text{rq}}$ with subject as fixed effect | $\hat{\beta}$ | CI <sub>low</sub> | CI <sub>up</sub> |
|-----------------|-------------------------------------------|--------------------------------------------------------|---------------|-------------------|------------------|
| Intercept       | 2.645                                     | 2.728                                                  | 2.516         | 2.253             | 2.939            |
| PartnerP        | 0.059                                     | 0.078                                                  | 0.093         | -0.177            | 0.327            |
| NoveltyO        | 0.099                                     | 0.020                                                  | 0.030         | -0.170            | 0.213            |
| Block2          | 0.046                                     | 0.131                                                  | 0.114         | -0.059            | 0.320            |
| DirectionW      | 0.208                                     | 0.255                                                  | 0.225         | -0.068            | 0.626            |
| ExtremityM      | 0.184                                     | 0.130                                                  | 0.099         | -0.095            | 0.371            |
| IntDrcExt       | -0.057                                    | -0.181                                                 | -0.130        | -0.501            | 0.216            |
| IntDrcPartner_P | -0.167                                    | -0.190                                                 | -0.202        | -0.602            | 0.158            |

### 70%-Quantile Regression of Repeated Reaction-Times

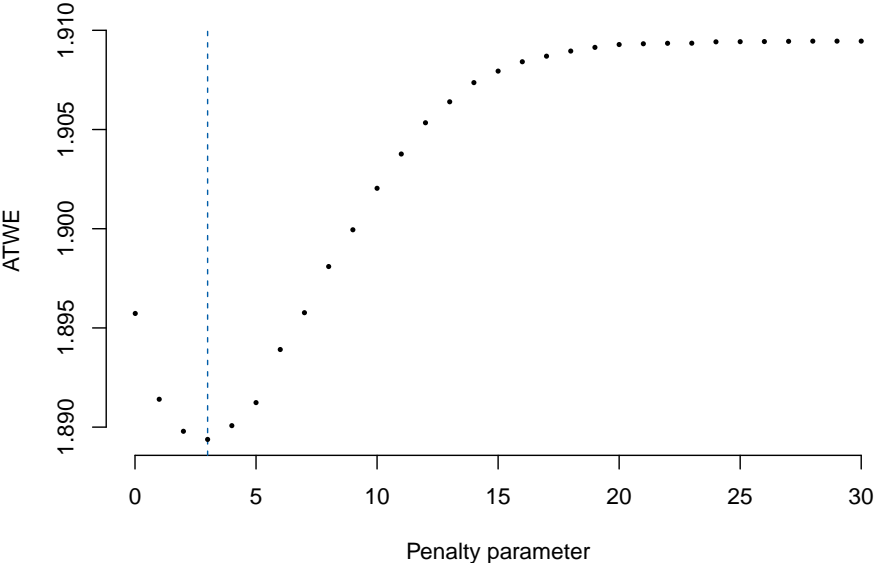

Figure S16: Average  $\tau$ -weighted error (ATWE) across penalty parameter proposals.

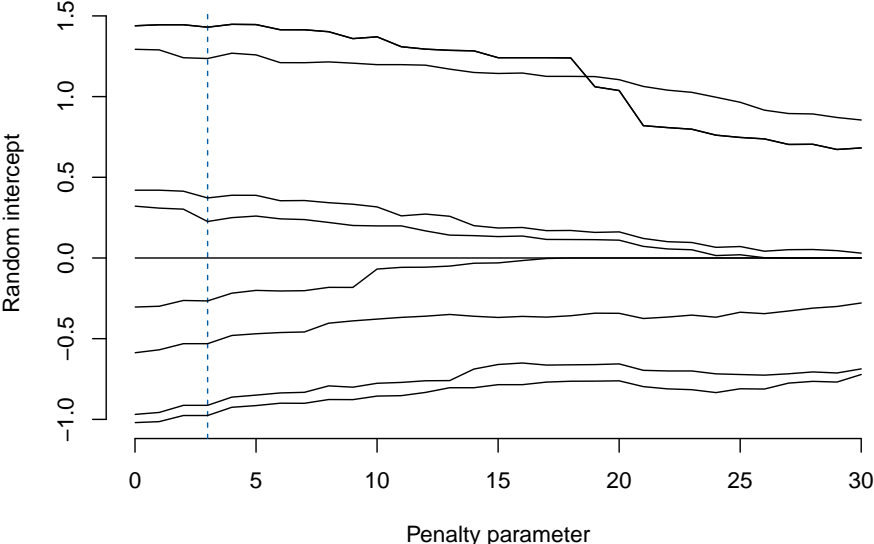

Figure S17: Normalized random intercepts across penalty parameter proposals.

|                 | $\hat{\beta}_{\text{rq}}$ without subject | $\hat{\beta}_{\text{rq}}$ with subject as fixed effect | $\hat{\beta}$ | CI <sub>low</sub> | CI <sub>up</sub> |
|-----------------|-------------------------------------------|--------------------------------------------------------|---------------|-------------------|------------------|
| Intercept       | 3.200                                     | 3.293                                                  | 3.209         | 2.735             | 3.738            |
| PartnerP        | 0.252                                     | 0.193                                                  | 0.212         | -0.143            | 0.521            |
| NoveltyO        | 0.096                                     | 0.065                                                  | 0.047         | -0.192            | 0.316            |
| Block2          | 0.091                                     | 0.147                                                  | 0.126         | -0.120            | 0.404            |
| DirectionW      | 0.254                                     | 0.536                                                  | 0.527         | 0.007             | 0.952            |
| ExtremityM      | 0.141                                     | 0.134                                                  | 0.113         | -0.220            | 0.471            |
| IntDrcExt       | 0.145                                     | -0.142                                                 | -0.112        | -0.590            | 0.469            |
| IntDrcPartner_P | -0.422                                    | -0.565                                                 | -0.540        | -1.038            | -0.018           |

### 80%-Quantile Regression of Repeated Reaction-Times

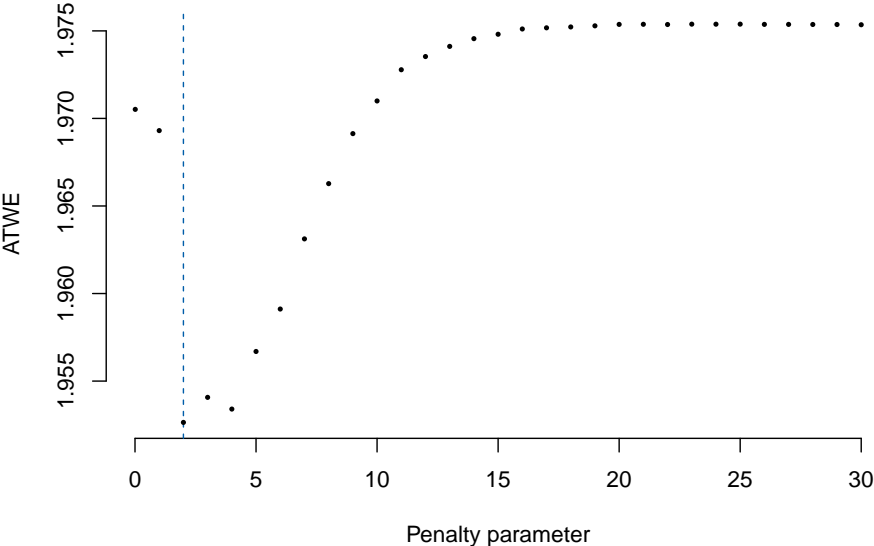

Figure S18: Average  $\tau$ -weighted error (ATWE) across penalty parameter proposals.

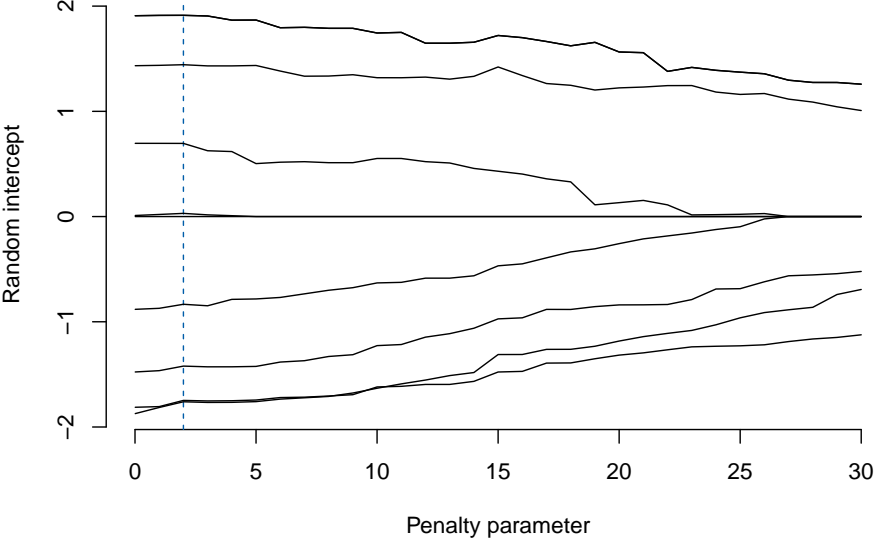

Figure S19: Normalized random intercepts across penalty parameter proposals.

|                 | $\hat{\beta}_{\text{rq}}$ without subject | $\hat{\beta}_{\text{rq}}$ with subject as fixed effect | $\hat{\beta}$ | CI <sub>low</sub> | CI <sub>up</sub> |
|-----------------|-------------------------------------------|--------------------------------------------------------|---------------|-------------------|------------------|
| Intercept       | 4.109                                     | 4.343                                                  | 4.507         | 3.621             | 5.029            |
| PartnerP        | 0.683                                     | 0.270                                                  | 0.268         | -0.270            | 0.719            |
| NoveltyO        | 0.201                                     | 0.246                                                  | 0.290         | -0.166            | 0.660            |
| Block2          | -0.054                                    | 0.213                                                  | 0.217         | -0.131            | 0.635            |
| DirectionW      | 0.625                                     | 0.779                                                  | 0.787         | 0.098             | 1.422            |
| ExtremityM      | 0.118                                     | -0.024                                                 | -0.039        | -0.424            | 0.554            |
| IntDrcExt       | 0.424                                     | 0.220                                                  | 0.211         | -0.621            | 0.919            |
| IntDrcPartner_P | -1.100                                    | -0.963                                                 | -0.941        | -1.675            | -0.142           |

### 90%-Quantile Regression of Repeated Reaction-Times

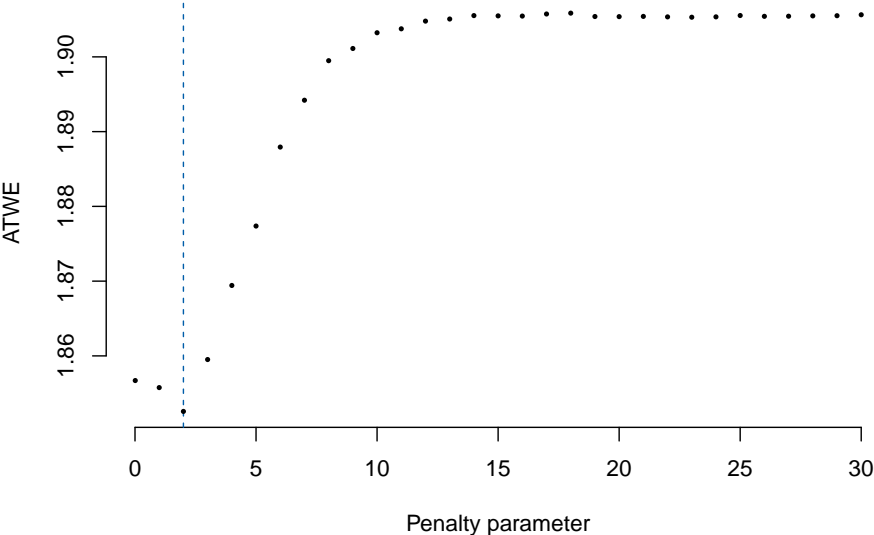

Figure S20: Average  $\tau$ -weighted error (ATWE) across penalty parameter proposals.

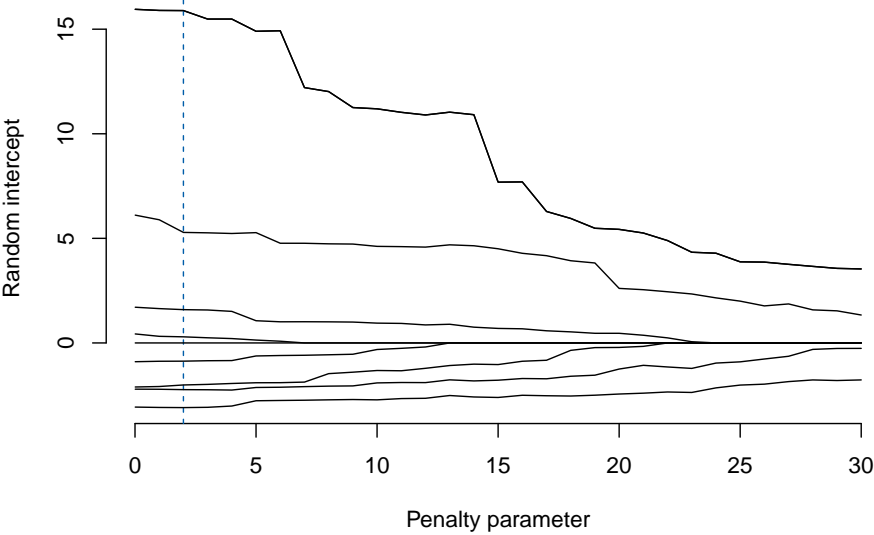

Figure S21: Normalized random intercepts across penalty parameter proposals.

|                 | $\hat{\beta}_{\text{rq}}$ without subject | $\hat{\beta}_{\text{rq}}$ with subject as fixed effect | $\hat{\beta}$ | CI <sub>low</sub> | CI <sub>up</sub> |
|-----------------|-------------------------------------------|--------------------------------------------------------|---------------|-------------------|------------------|
| Intercept       | 6.129                                     | 7.791                                                  | 6.046         | 4.783             | 7.641            |
| PartnerP        | 0.542                                     | 0.144                                                  | 0.163         | -0.952            | 1.260            |
| NoveltyO        | 0.740                                     | 0.417                                                  | 0.327         | -0.347            | 1.634            |
| Block2          | 0.122                                     | 0.357                                                  | 0.379         | -0.823            | 0.997            |
| DirectionW      | 4.450                                     | 3.494                                                  | 3.728         | 0.599             | 5.835            |
| ExtremityM      | -0.247                                    | 0.790                                                  | 0.767         | -0.615            | 1.632            |
| IntDrcExt       | 0.662                                     | -0.290                                                 | -0.293        | -2.126            | 2.055            |
| IntDrcPartner_P | -4.620                                    | -3.574                                                 | -3.768        | -5.940            | -0.695           |



### 95%-Quantile Regression of Repeated Reaction-Times

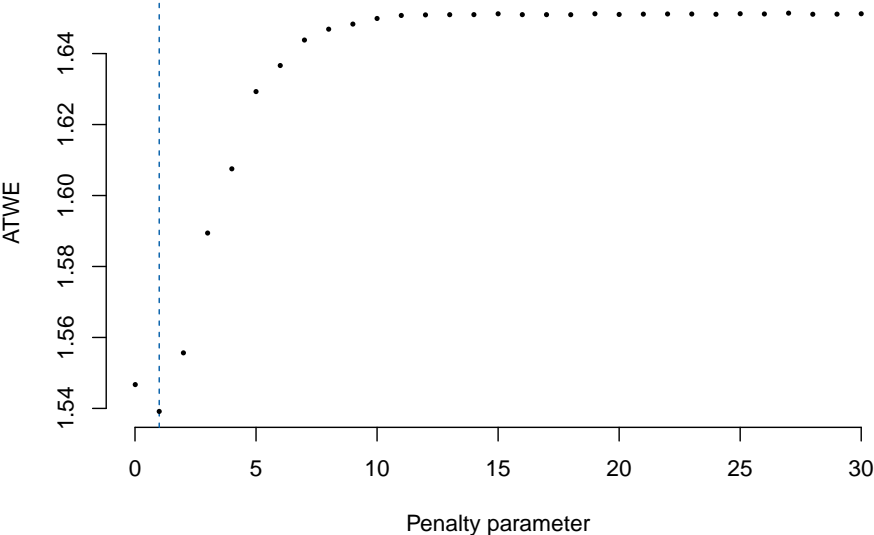

Figure S22: Average  $\tau$ -weighted error (ATWE) across penalty parameter proposals.

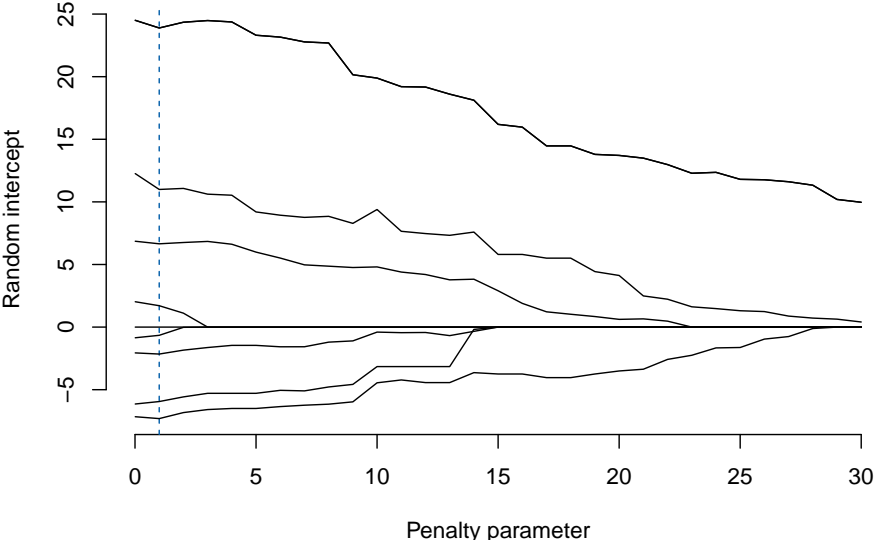

Figure S23: Normalized random intercepts across penalty parameter proposals.

|                 | $\hat{\beta}_{\mathbf{r}\mathbf{q}}$ without subject | $\hat{\beta}_{\mathbf{r}\mathbf{q}}$ with subject as fixed effect | $\hat{\beta}$ | CI <sub>low</sub> | CI <sub>up</sub> |
|-----------------|------------------------------------------------------|-------------------------------------------------------------------|---------------|-------------------|------------------|
| Intercept       | 10.523                                               | 14.889                                                            | 11.824        | 6.639             | 14.299           |
| PartnerP        | 3.991                                                | 0.315                                                             | 0.773         | -1.454            | 5.590            |
| NoveltyO        | 3.178                                                | 0.916                                                             | 0.568         | -0.788            | 3.619            |
| Block2          | 0.258                                                | -0.750                                                            | -0.693        | -2.515            | 1.294            |
| DirectionW      | 11.666                                               | 6.780                                                             | 7.352         | 2.751             | 12.794           |
| ExtremityM      | 0.875                                                | 1.029                                                             | 0.760         | -1.302            | 5.298            |
| IntDrcExt       | -2.808                                               | -1.253                                                            | -1.387        | -6.221            | 3.603            |
| IntDrcPartner_P | -14.715                                              | -7.416                                                            | -8.099        | -14.301           | -3.097           |

### 3.3 Verification Using Bayesian Quantile Regression of Repeated Reaction-Times

To verify our findings from the frequentist Quantile Regression framework, we applied a Bayesian Quantile Regression framework to the reaction-times with Ridge-penalization priors on the nuisance parameters capturing subject-specific heterogeneity. The Bayesian formulation of Quantile Regression relies on assuming the asymmetric Laplace distribution as auxiliary error distribution, yielding posterior modes in analogy to frequentist estimates. This approach is implemented in BayesX (Brezger et al., 2005) using Markov chain Monte Carlo (MCMC) sampling from the posterior distribution, and described in Waldmann et al. (2013). The results are shown in Figure S24: We only get slight differences in the coefficient estimates and, in conclusion, this reaffirms our findings on the upper quantiles of reaction-time.

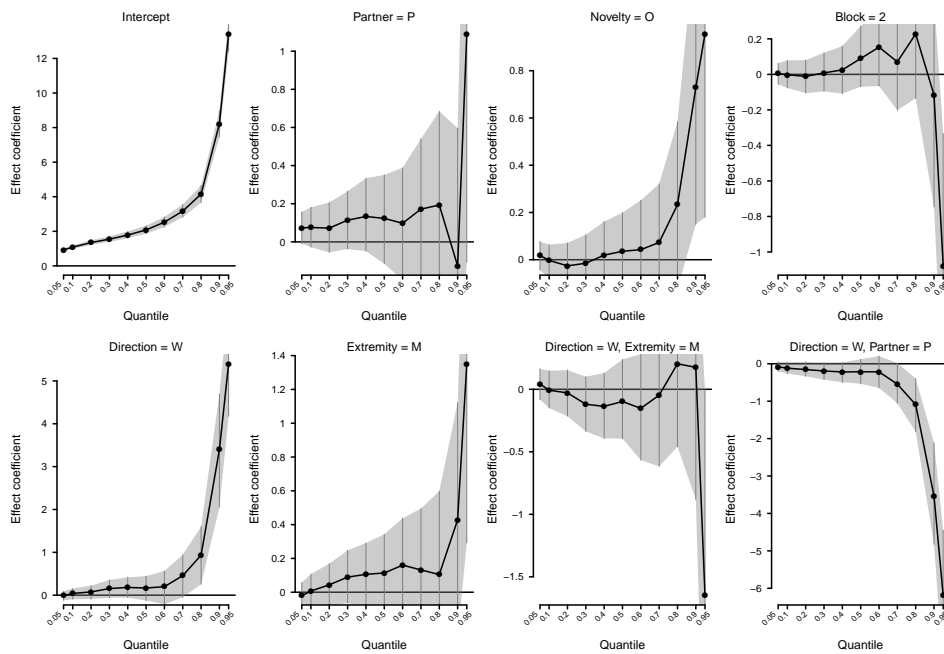

Figure S24: Results from Bayesian Quantile Regression.

## References

- D. Bates, M. Mächler, B. Bolker, and S. Walker. Fitting linear mixed-effects models using lme4. *Journal of Statistical Software*, 67(1):1–48, 2015. doi: 10.18637/jss.v067.i01.
- A. Brezger, T. Kneib, and S. Lang. Bayesx: Analyzing bayesian structural additive regression models. *Journal of Statistical Software*, 14(1):1–22, 2005. ISSN 1548-7660. doi: 10.18637/jss.v014.i11.
- H. Haupt, K. Kagerer, and J. Schnurbus. Cross-validating fit and predictive accuracy of nonlinear quantile regressions. *Journal of Applied Statistics*, 38(12):2939–2954, 2011. doi: 10.1080/02664763.2011.573542.
- A. Karlsson. Bootstrap methods for bias correction and confidence interval estimation for nonlinear quantile regression of longitudinal data. *Journal of Statistical Computation and Simulation*, 79(10):1205–1218, 2009. doi: 10.1080/00949650802221180.
- R. Koenker. Quantile regression for longitudinal data. *Journal of Multivariate Analysis*, 91(2):74–89, 2004. doi: 10.1016/j.jmva.2004.05.006.
- R. Koenker. *quantreg: Quantile Regression*, 2015. URL <http://CRAN.R-project.org/package=quantreg>. R package version 5.19.
- R Core Team. *R: A Language and Environment for Statistical Computing*. R Foundation for Statistical Computing, Vienna, Austria, 2015. URL <https://www.R-project.org/>.
- E. Waldmann, T. Kneib, Y. Yue, S. Lang, and C. Flexeder. Bayesian semiparametric additive quantile regression. *Statistical Modelling*, 13:223–252, 2013.
